# Supplementary material for: Complex controls on nitrous oxide flux across a long elevation gradient in the tropical Peruvian Andes
Source: Copernicus journal article supplement (doi:10.5194/bg-2017-107), 2017-03-30

1 **Supplementary Online Materials**

2 **Figure S1.**  $^{15}\text{N}$ - $\text{N}_2\text{O}$  flux from nitrate reduction (mid-grey bars) or nitrate reduction +  
3 nitrification (white bars) during the (a) early ( $\leq 24$  hours) and (b) late ( $> 24$  hours) incubation  
4 phases of the of the water-filled pore space experiment. The bar charts show means and  
5 standard errors.

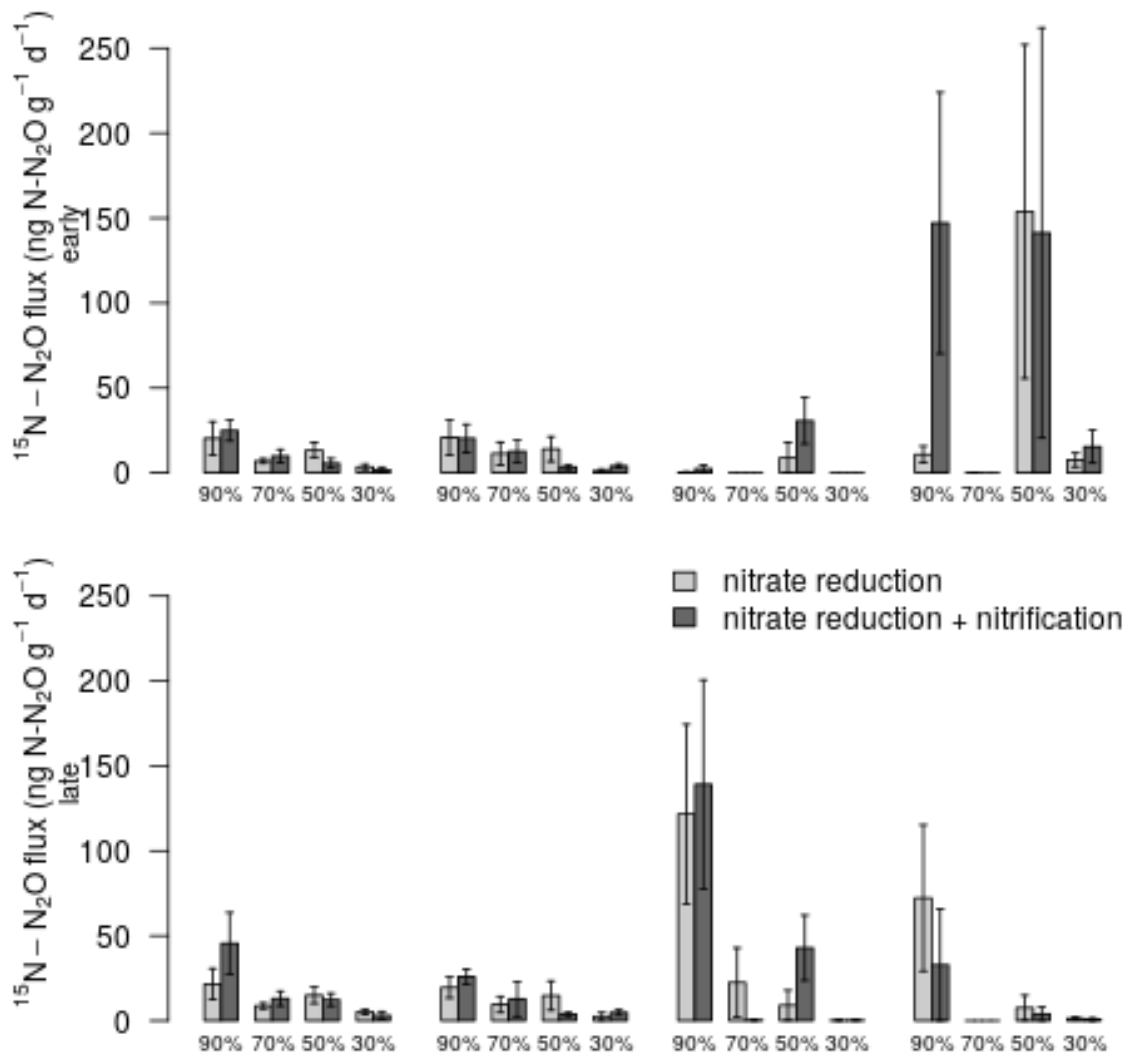

Supplement: Supplementary file 1 [file bg-2017-107-supplement.pdf]
